# Supplementary material
Source: PubMed Central journal article supplement (PMC3164238)
Supplement: NIHMS314922-supplement-1.pdf [file NIHMS314922-supplement-1.pdf]

**Uwr rgo gpvct { 'Figure S1**

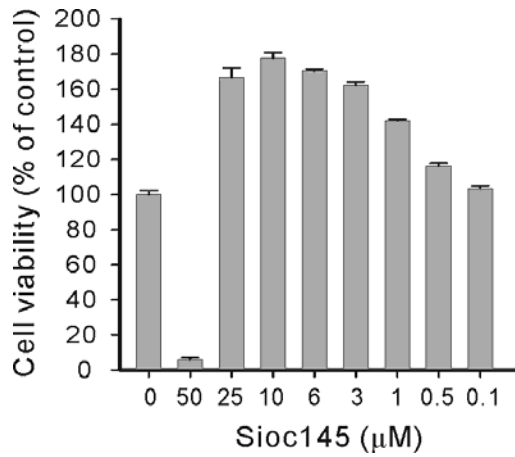

**Figure S1 Effect of Sioc145 on cell viability.** Viability of H4 cells treated with indicated concentrations of Sioc145 for 24 h was analyzed by MTT assay. The viability was normalized to that of DMSO-treated cells which is set as 100%. Error bars represent SD from three independent experiments.
