# Supplementary material
Source: PubMed Central journal article supplement (PMC3164238)
Supplement: NIHMS314922-supplement-3.pdf [file NIHMS314922-supplement-3.pdf]

Supplementary Figure S3

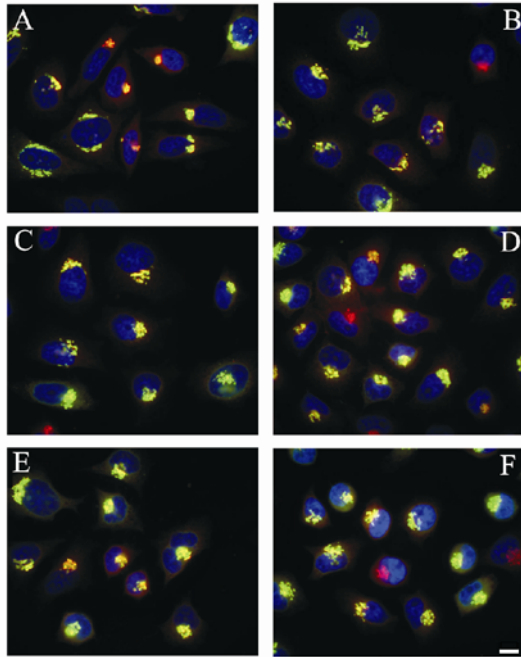

**Figure S3** The effect of Sioc145 on *trans*-Golgi protein Galt. H4-Galt (green) stable cells were treated with DMSO (A), 5  $\mu$ M Sioc145 for 1 h (B), 2 h (C), 4 h (D), 8 h (E) or 24 h (F), then fixed and stained with GM130 antibody (red) and DAPI (blue). Bar, 10  $\mu$ m.
