# Supplementary material
Source: PubMed Central journal article supplement (PMC3164238)
Supplement: NIHMS314922-supplement-4.pdf [file NIHMS314922-supplement-4.pdf]

### Supplementary Figure S4

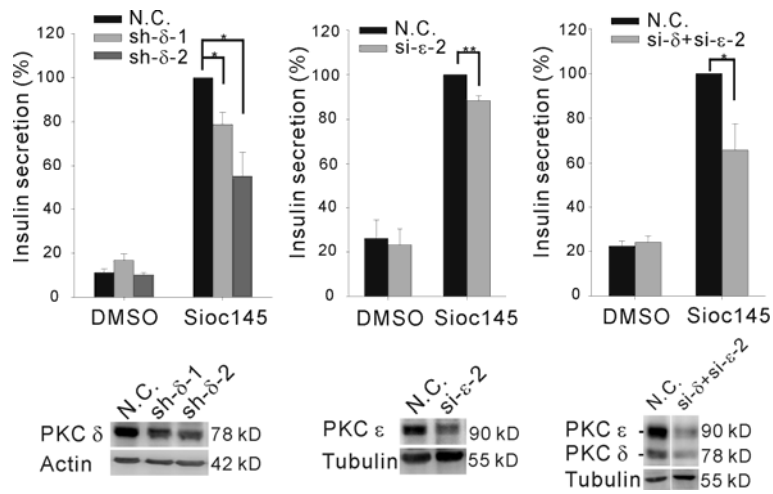

**Figure S4 Selective activation of nPKCs is required for insulinotropic action of Sioc145.**

Insulin secretion in PKC  $\delta$  and/or  $\epsilon$  downregulated cells. Cells transfected with indicated siRNA(s) or shRNA were stimulated with DMSO or 1  $\mu$ M Sioc145 at 16.7 mM glucose concentration. Insulin secretion from Sioc145-treated control cells (N.C.) were set as 100%. Error bars represent SEM from at least three independent experiments. \*,  $p < 0.05$ ; \*\*,  $p < 0.01$ .
